# Supplementary material
Source: Research Square preprint supplement (doi:10.21203/rs.3.rs-9597953/v1)
Supplement: Supplementary file 1 [file 3aad2a9abd31ab2becd691b8.xlsx]

## Sheet: Sup1_Marker-gene set
Sub_cluster	rank	gene	scores	logfoldchanges	pvals	pvals_adj	pct_in	pct_out
B_cells	3	Cd79a	6.9232	13.5364	4.4154e-12	8.91862e-09	0.8	0.00089209
B_cells	8	H2-DMb2	5.95258	3.54192	2.63943e-09	1.77712e-06	0.8	0.247274
B_cells	9	Igkc	5.76691	7.02638	8.07365e-09	4.89236e-06	0.68	0.023756
B_cells	10	Malat1	5.49734	1.89953	3.85566e-08	1.89438e-05	1	0.979251
B_cells	11	Cd74	5.23781	4.54478	1.62495e-07	6.33909e-05	1	0.41469
B_cells	13	Cd79b	5.13528	7.86773	2.81728e-07	9.20812e-05	0.6	0.016355
B_cells	15	Napsa	4.99396	3.53498	5.91527e-07	0.000157667	0.68	0.270138
B_cells	16	Mef2c	4.95481	5.31983	7.23998e-07	0.000182799	0.6	0.0554087
B_cells	18	H2-Eb1	4.93754	3.54077	7.9115e-07	0.000193833	0.96	0.382575
B_cells	21	Ifi30	4.85525	3.14092	1.20238e-06	0.000269852	0.72	0.333113
B_cells	22	Gm42418	4.83165	2.02981	1.35403e-06	0.000286219	1	0.995507
B_cells	23	H2-Aa	4.79952	3.61205	1.59048e-06	0.00032856	0.92	0.389513
B_cells	24	Tsc22d3	4.79289	2.59308	1.64392e-06	0.000335785	0.72	0.427443
B_cells	27	Cd37	4.45154	2.05394	8.52563e-06	0.00128089	0.72	0.554153
B_cells	28	H2-Ab1	4.43441	3.1245	9.23229e-06	0.0013535	0.96	0.495242
B_cells	29	Iglc3	4.34807	5.90318	1.3734e-05	0.00181033	0.52	0.0200225
CD4_Tcm_Tcf7	1	Ifngr1	26.889	2.25512	2.9573e-159	1.79203e-155	0.914654	0.647219
CD4_Tcm_Tcf7	6	Vps37b	23.1092	2.14102	3.74555e-118	6.19003e-115	0.834138	0.543579
CD4_Tcm_Tcf7	8	Pnrc1	22.4707	1.47714	8.03955e-112	1.04394e-108	0.924316	0.764307
CD4_Tcm_Tcf7	9	Klf2	22.2478	2.84562	1.18438e-109	1.43539e-106	0.710145	0.308965
CD4_Tcm_Tcf7	10	Zfp36l2	22.043	1.98403	1.1159e-107	1.26788e-104	0.830918	0.603573
CD4_Tcm_Tcf7	13	Lat	21.5255	1.84927	8.98803e-103	7.78063e-100	0.821256	0.509336
CD4_Tcm_Tcf7	14	Limd2	21.5157	1.65971	1.11111e-102	9.18133e-100	0.872786	0.628244
CD4_Tcm_Tcf7	15	Gm8369	21.3672	2.23959	2.69574e-101	2.04191e-98	0.723027	0.38335
CD4_Tcm_Tcf7	17	Eif1	21.1785	0.787209	1.5068e-99	1.05355e-96	0.988728	0.961375
CD4_Tcm_Tcf7	20	Gimap3	20.3657	1.81308	3.36733e-92	1.91296e-89	0.830918	0.532861
CD4_Tcm_Tcf7	24	Gramd3	19.9521	2.30765	1.43675e-88	7.05908e-86	0.68438	0.349309
CD4_Tcm_Tcf7	25	Myl12b	19.7112	1.05712	1.72865e-86	7.66467e-84	0.927536	0.836266
CD4_Tcm_Tcf7	27	Fau	19.4419	0.487706	3.41598e-84	1.32126e-81	0.993559	0.992653
CD4_Tcm_Tcf7	28	Gimap6	18.998	1.8406	1.77007e-80	6.43562e-78	0.726248	0.440782
CD4_Tcm_Tcf7	29	Il7r	18.8476	2.03836	3.07191e-79	1.09499e-76	0.713366	0.429626
CD4_Tcm_Tcf7	30	Tpt1	18.7619	0.511576	1.54671e-78	5.30522e-76	0.995169	0.990866
CD4_Th_Bhlhe40	1	Cd4	37.926	3.85394	0	0	0.59673	0.086625
CD4_Th_Bhlhe40	2	Ifngr1	37.6381	1.86504	5.11803444478977E-310	4.65204e-306	0.881744	0.637932
CD4_Th_Bhlhe40	3	Cd2	36.9354	1.98993	1.2512e-298	5.68637e-295	0.827248	0.490055
CD4_Th_Bhlhe40	4	Icos	36.3686	2.04047	1.33545e-289	4.85543e-286	0.849046	0.499684
CD4_Th_Bhlhe40	5	Bhlhe40	35.1275	1.6113	2.56374e-270	7.76771e-267	0.889373	0.692965
CD4_Th_Bhlhe40	6	Tnfrsf4	31.9575	2.07231	4.24428e-224	6.42973e-221	0.731335	0.379885
CD4_Th_Bhlhe40	7	Hif1a	31.8238	1.33852	3.03671e-222	4.24649e-219	0.880654	0.753584
CD4_Th_Bhlhe40	8	Il2rg	31.479	1.11469	1.68412e-217	2.18682e-214	0.881744	0.775864
CD4_Th_Bhlhe40	9	Cxcr6	31.2029	1.88834	9.73346e-214	1.04085e-210	0.779292	0.449852
CD4_Th_Bhlhe40	10	Gimap3	30.2471	1.62125	5.70249e-201	5.45608e-198	0.817439	0.521015
CD4_Th_Bhlhe40	11	Cd28	29.2564	1.62155	3.72694e-188	2.71008e-185	0.758583	0.472168
CD4_Th_Bhlhe40	12	Tnfrsf18	28.9653	1.59443	1.80226e-184	1.21346e-181	0.770027	0.499121
CD4_Th_Bhlhe40	13	Lat	28.5232	1.48033	6.03448e-179	3.91789e-176	0.774932	0.499016
CD4_Th_Bhlhe40	14	H2-Q4	27.799	1.02374	4.45787e-170	2.45575e-167	0.923706	0.814345
CD4_Th_Bhlhe40	15	Ets1	27.6011	1.48042	1.0797e-167	5.45217e-165	0.777112	0.514935
CD4_Th_Bhlhe40	16	Ltb	27.4704	1.48218	3.96103e-166	1.94615e-163	0.827793	0.575134
CD4_Th_Bhlhe40	17	Ms4a4b	27.3114	1.80996	3.10354e-164	1.44665e-161	0.92752	0.568035
CD4_Th_Bhlhe40	18	Cd69	27.0236	1.90487	7.80811e-161	3.1543e-158	0.647956	0.393239
CD4_Th_Bhlhe40	19	Inpp4b	26.5665	1.66458	1.65515e-155	6.40192e-153	0.673025	0.409123
CD4_Th_Bhlhe40	20	Cd82	26.3889	1.55038	1.83977e-153	6.82556e-151	0.686104	0.478599
CD4_Th_Bhlhe40	21	Cd40lg	26.3706	4.47117	2.98226e-153	1.08429e-150	0.39346	0.0313818
CD4_Th_Bhlhe40	22	Gpr183	26.0114	1.97603	3.6846e-149	1.26382e-146	0.576567	0.289816
CD4_Th_Bhlhe40	23	Cd6	25.7452	1.85762	3.64409e-146	1.22678e-143	0.60109	0.334762
CD4_Th_Bhlhe40	24	Tnfaip3	25.7148	1.15253	7.98934e-146	2.64069e-143	0.86703	0.755552
CD4_Th_Bhlhe40	25	Lck	24.9615	1.31816	1.60331e-137	4.70107e-135	0.837057	0.539886
CD4_Th_Bhlhe40	26	Cd5	24.815	1.86274	6.18277e-136	1.72918e-133	0.574932	0.3044
CD4_Th_Bhlhe40	27	Itk	24.8027	1.60761	8.38584e-136	2.30979e-133	0.659401	0.414781
CD4_Th_Bhlhe40	28	Skap1	24.4637	1.29436	3.60141e-132	9.77166e-130	0.740054	0.489844
CD4_Th_Bhlhe40	29	H2-Q6	24.061	0.888126	6.40076e-128	1.6161e-125	0.906812	0.826539
CD4_Th_Bhlhe40	30	Gramd3	24.0234	1.86736	1.58566e-127	3.94872e-125	0.587466	0.341264
CD4_Treg	1	Tnfrsf4	63.9653	4.48434	0	0	0.941602	0.364297
CD4_Treg	2	Icos	58.7716	3.37533	0	0	0.950904	0.491501
CD4_Treg	3	Cd2	58.7274	3.1984	0	0	0.936434	0.481415
CD4_Treg	4	Tnfrsf18	58.5868	3.26954	0	0	0.92093	0.487869
CD4_Treg	5	Foxp3	58.2281	7.2399	0	0	0.80155	0.0252151
CD4_Treg	6	Ikzf2	57.2877	4.91743	0	0	0.828424	0.146495
CD4_Treg	7	Ctla4	56.5112	3.46679	0	0	0.924548	0.452532
CD4_Treg	8	Tnfrsf9	55.1909	3.19645	0	0	0.951938	0.538052
CD4_Treg	9	H2-D1	54.4932	1.14496	0	0	0.998966	0.991042
CD4_Treg	10	H2-K1	54.3141	1.19254	0	0	0.998966	0.982402
CD4_Treg	11	Il2ra	49.3865	4.05503	0	0	0.756589	0.199006
CD4_Treg	12	Zfp36l1	48.9167	2.50962	0	0	0.893023	0.65256
CD4_Treg	13	Pim1	46.0197	2.00704	0	0	0.934884	0.75328
CD4_Treg	14	Shisa5	45.5535	1.70906	0	0	0.94677	0.811116
CD4_Treg	15	Itgb7	45.1555	2.95101	0	0	0.778811	0.311327
CD4_Treg	16	Ltb	44.471	2.36136	0	0	0.896124	0.56958
CD4_Treg	17	Tigit	44.2804	2.57755	0	0	0.816021	0.428551
CD4_Treg	18	Cd5	43.4935	2.98708	0	0	0.742636	0.292002
CD4_Treg	19	H2-Q4	41.9073	1.50888	0	0	0.952972	0.811962
CD4_Treg	20	H2-Q6	41.5732	1.48511	0	0	0.949354	0.823353
CD4_Treg	21	Sdf4	41.1866	1.92108	0	0	0.907494	0.665538
CD4_Treg	22	Itgae	40.2969	5.63541	0	0	0.568992	0.0336084
CD4_Treg	23	Ccr8	39.3124	3.76658	0	0	0.627907	0.153371
CD4_Treg	24	Izumo1r	38.0327	4.01365	0	0	0.583463	0.107773
CD4_Treg	25	Pglyrp1	37.9326	2.29986	0	0	0.756072	0.415044
CD4_Treg	26	Ly6a	37.5659	2.25376	0	4.26263e-306	0.875452	0.644202
CD4_Treg	27	Hif1a	36.5279	1.48308	4.00578e-292	2.02281e-289	0.902326	0.751657
CD4_Treg	28	Klrg1	36.2506	5.98545	9.70946e-288	4.64495e-285	0.508527	0.0254972
CD4_Treg	29	Ifngr1	35.9908	1.75963	1.16365e-283	5.03665e-281	0.865633	0.638172
CD4_Treg	30	Gzmb	35.911	2.42263	2.05869e-282	8.50568e-280	0.951421	0.572683
CD8_Teff_Ifit3	1	Ifitm1	37.2135	4.35519	4.12738e-303	7.50317e-299	0.932432	0.413916
CD8_Teff_Ifit3	5	Ctsw	31.4909	2.47073	1.1587e-217	4.2128e-214	0.936118	0.433491
CD8_Teff_Ifit3	6	Ifitm2	31.3742	2.53909	4.5454e-216	1.37718e-212	1	0.679784
CD8_Teff_Ifit3	8	Lat	30.2958	2.14689	1.30014e-201	2.95441e-198	0.937346	0.504088
CD8_Teff_Ifit3	9	Zfp36l2	30.1304	2.16825	1.93901e-199	3.91658e-196	0.927518	0.599416
CD8_Teff_Ifit3	10	Gramd3	30.1151	2.54954	3.07656e-199	5.59287e-196	0.84398	0.342708
CD8_Teff_Ifit3	12	Cd8b1	29.7946	2.51503	4.58755e-195	6.94976e-192	0.960688	0.459579
CD8_Teff_Ifit3	16	Ly6c1	29.1601	2.18023	6.21405e-187	7.06032e-184	0.947174	0.594599
CD8_Teff_Ifit3	21	Gimap3	27.9674	2.03027	4.0453e-172	3.50188e-169	0.937346	0.527971
CD8_Teff_Ifit3	22	Ms4a4b	27.5635	2.36632	3.04747e-167	2.51818e-164	0.995086	0.578621
CD8_Teff_Ifit3	24	Selplg	26.842	1.63142	1.04683e-158	7.92932e-156	0.982801	0.708077
CD8_Teff_Ifit3	25	Bcl2	26.6112	2.375	5.03581e-156	3.66184e-153	0.77027	0.32103
CD8_Teff_Ifit3	27	Ifngr1	26.1906	1.74314	3.40361e-151	2.29164e-148	0.948403	0.644536
CD8_Teff_Ifit3	30	Itgb7	25.2029	2.12106	3.72645e-140	2.2581e-137	0.787469	0.328867
CD8_Teff_Pdcd1	1	Cd8a	112.415	3.92013	0	0	0.938723	0.252109
CD8_Teff_Pdcd1	2	Nkg7	111.511	3.84141	0	0	0.97671	0.404411
CD8_Teff_Pdcd1	3	Lag3	101.95	3.42801	0	0	0.91533	0.256132
CD8_Teff_Pdcd1	4	Prf1	101.549	3.66455	0	0	0.889556	0.244692
CD8_Teff_Pdcd1	5	Cd8b1	100.108	3.44417	0	0	0.924335	0.261706
CD8_Teff_Pdcd1	6	Cd3g	100.044	3.19304	0	0	0.961081	0.400339
CD8_Teff_Pdcd1	7	Klrd1	98.239	3.09738	0	0	0.894214	0.286088
CD8_Teff_Pdcd1	8	Rgs16	96.991	3.63451	0	0	0.841528	0.193456
CD8_Teff_Pdcd1	9	Eef1a1	96.6038	1.27775	0	0	0.999482	0.989142
CD8_Teff_Pdcd1	10	Pdcd1	96.1194	3.25977	0	0	0.878998	0.24285
CD8_Teff_Pdcd1	11	Cd3e	95.6493	3.07367	0	0	0.959839	0.416335
CD8_Teff_Pdcd1	12	Thy1	95.1782	3.0066	0	0	0.955181	0.402084
CD8_Teff_Pdcd1	13	Cd3d	95.0159	2.89959	0	0	0.946382	0.380611
CD8_Teff_Pdcd1	14	Cst7	94.9834	2.95226	0	0	0.866577	0.291614
CD8_Teff_Pdcd1	15	Klrc1	93.8151	3.09285	0	0	0.911707	0.288706
CD8_Teff_Pdcd1	16	Sh2d2a	90.8577	2.68748	0	0	0.895559	0.319389
CD8_Teff_Pdcd1	17	Ms4a4b	90.1729	3.01874	0	0	0.959424	0.416723
CD8_Teff_Pdcd1	19	Gzmb	88.7075	3.29588	0	0	0.959114	0.427242
CD8_Teff_Pdcd1	21	Cxcr6	87.3026	2.83297	0	0	0.870407	0.28221
CD8_Teff_Pdcd1	22	Eef2	86.6492	1.4944	0	0	0.979505	0.893505
CD8_Teff_Pdcd1	23	Ndfip1	86.2826	2.13429	0	0	0.932616	0.588851
CD8_Teff_Pdcd1	24	Eif3h	86.0061	1.68937	0	0	0.935203	0.71144
CD8_Teff_Pdcd1	27	B4galnt1	83.8956	2.30661	0	0	0.889349	0.39079
CD8_Teff_Pdcd1	28	Zap70	83.6963	2.47446	0	0	0.841528	0.278526
CD8_Teff_Pdcd1	29	Nrgn	83.0055	3.23193	0	0	0.730877	0.1492
CD8_Teff_Pdcd1	30	Ifng	82.4234	3.13692	0	0	0.755719	0.194523
CD8_Tex_Mki67	1	Tubb5	72.8811	3.76644	0	0	0.999022	0.71294
CD8_Tex_Mki67	2	Pclaf	71.6943	5.48822	0	0	0.984848	0.121756
CD8_Tex_Mki67	3	Stmn1	71.0371	4.95189	0	0	0.990714	0.210905
CD8_Tex_Mki67	4	Hmgb2	70.1908	3.2598	0	0	0.999511	0.635086
CD8_Tex_Mki67	5	Top2a	69.8735	4.79672	0	0	0.97654	0.174438
CD8_Tex_Mki67	6	Birc5	69.7061	5.65942	0	0	0.955034	0.0648964
CD8_Tex_Mki67	7	Ccna2	68.5075	5.72692	0	0	0.935973	0.0478315
CD8_Tex_Mki67	8	Smc2	68.0139	4.49519	0	0	0.959433	0.122889
CD8_Tex_Mki67	9	Spc24	67.2925	5.30731	0	0	0.924242	0.0540627
CD8_Tex_Mki67	10	Rrm2	67.0937	5.45069	0	0	0.926686	0.0793415
CD8_Tex_Mki67	11	Mki67	66.8439	4.51002	0	0	0.959922	0.12781
CD8_Tex_Mki67	12	Cdca8	65.8415	4.86851	0	0	0.920821	0.0655691
CD8_Tex_Mki67	13	Ptma	65.629	1.87116	0	0	0.999022	0.948947
CD8_Tex_Mki67	14	Cks1b	65.5765	4.54381	0	0	0.92522	0.103346
CD8_Tex_Mki67	15	H2afx	64.653	4.06071	0	0	0.945748	0.213985
CD8_Tex_Mki67	16	Tk1	63.1893	4.4504	0	0	0.898338	0.0923349
CD8_Tex_Mki67	17	Asf1b	63.0651	4.51637	0	0	0.893451	0.0785626
CD8_Tex_Mki67	18	Tubb4b	63.0591	3.26749	0	0	0.969208	0.379288
CD8_Tex_Mki67	19	Cdk1	62.7893	5.0116	0	0	0.86999	0.055231
CD8_Tex_Mki67	20	Hmgb1	62.3845	2.22196	0	0	0.995112	0.707488
CD8_Tex_Mki67	21	H2afz	61.4884	2.24007	0	0	0.99609	0.830412
CD8_Tex_Mki67	22	H2afv	61.4655	3.03472	0	0	0.976051	0.404355
CD8_Tex_Mki67	23	Ube2c	61.1344	5.15539	0	0	0.863148	0.0851478
CD8_Tex_Mki67	24	Nusap1	60.7213	5.44313	0	0	0.831378	0.0326075
CD8_Tex_Mki67	25	Hmgn2	60.612	3.10519	0	0	0.963832	0.338856
CD8_Tex_Mki67	26	Smc4	60.3544	3.03555	0	0	0.967253	0.289857
CD8_Tex_Mki67	27	Selenoh	60.3128	3.01243	0	0	0.964321	0.28182
CD8_Tex_Mki67	28	Racgap1	60.1704	4.0066	0	0	0.876833	0.103664
CD8_Tex_Mki67	29	Cdca3	60.0696	5.23818	0	0	0.825513	0.0347672
CD8_Tex_Mki67	30	Pttg1	59.0545	3.68706	0	0	0.896383	0.168596
CD8_Tpex_Tcf7	1	Ccl5	35.7418	3.48043	8.88458e-280	1.61513e-275	0.948571	0.615129
CD8_Tpex_Tcf7	5	Gramd3	34.1316	2.73993	2.5082e-255	9.11931e-252	0.815238	0.339694
CD8_Tpex_Tcf7	6	Ifngr1	33.8403	2.08267	5.04766e-251	1.52936e-247	0.940952	0.642351
CD8_Tpex_Tcf7	8	Zfp36l2	32.2125	2.13341	1.18082e-227	2.68325e-224	0.887619	0.598201
CD8_Tpex_Tcf7	10	Gimap3	31.5005	2.07938	8.54895e-218	1.55411e-214	0.899048	0.526042
CD8_Tpex_Tcf7	12	Ms4a4b	31.2788	2.34392	9.05571e-215	1.37187e-211	0.98381	0.575664
CD8_Tpex_Tcf7	17	Lat	28.8238	1.87744	1.08057e-182	1.09131e-179	0.870476	0.502992
CD8_Tpex_Tcf7	19	Gimap4	28.6045	1.8818	5.90451e-180	5.3669e-177	0.871429	0.502958
CD8_Tpex_Tcf7	22	Cd8b1	28.3875	2.15624	2.88828e-177	2.18776e-174	0.880952	0.458397
CD8_Tpex_Tcf7	24	Selplg	27.7077	1.51316	5.63832e-169	3.79626e-166	0.948571	0.707089
CD8_Tpex_Tcf7	25	Vps37b	27.7028	1.91286	6.46015e-169	4.19425e-166	0.845714	0.538901
CD8_Tpex_Tcf7	27	Fau	26.1783	0.548942	4.68995e-151	2.5836e-148	0.998095	0.992476
CD8_Tpex_Tcf7	30	Gimap7	24.2798	1.69652	3.20746e-130	1.35601e-127	0.782857	0.459731
Mono_Ccl5	1	Apoe	58.0016	5.94246	0	0	0.945455	0.206741
Mono_Ccl5	2	Fth1	55.7508	2.87565	0	0	0.999351	0.978192
Mono_Ccl5	3	Ctss	54.4888	3.67862	0	0	0.994156	0.541199
Mono_Ccl5	4	Lyz2	52.8003	5.15841	0	0	0.998052	0.326876
Mono_Ccl5	5	Psap	52.6591	3.0675	0	0	0.996104	0.763973
Mono_Ccl5	6	Tnfaip2	52.4476	4.31514	0	0	0.916234	0.196932
Mono_Ccl5	7	Cxcl2	51.5166	5.56379	0	0	0.995455	0.289381
Mono_Ccl5	8	C3	51.399	4.26573	0	0	0.87987	0.174777
Mono_Ccl5	9	H2-Eb1	51.1793	4.59522	0	0	0.995455	0.350249
Mono_Ccl5	10	H2-Aa	50.9454	4.90918	0	0	0.999351	0.357309
Mono_Ccl5	11	H2-Ab1	50.825	4.39467	0	0	0.998701	0.468679
Mono_Ccl5	12	Sdc4	50.0811	3.62948	0	0	0.921429	0.27526
Mono_Ccl5	13	Cd74	49.4655	5.20119	0	0	1	0.383848
Mono_Ccl5	14	Ftl1	49.2072	2.32535	0	0	1	0.938715
Mono_Ccl5	15	Cd14	48.8045	4.22965	0	0	0.985065	0.298529
Mono_Ccl5	16	Pla2g7	48.501	3.61103	0	0	0.890909	0.225349
Mono_Ccl5	17	Ninj1	48.0549	3.31065	0	0	0.89026	0.298494
Mono_Ccl5	18	Ccrl2	47.9913	3.2696	0	0	0.948052	0.466871
Mono_Ccl5	19	Ier3	47.3689	3.06624	0	0	0.951948	0.526069
Mono_Ccl5	20	Cybb	47.201	3.46987	0	0	0.911039	0.263226
Mono_Ccl5	21	Cebpb	46.5308	3.30391	0	0	0.987013	0.487218
Mono_Ccl5	22	Gm42418	45.3827	2.38134	0	0	1	0.99527
Mono_Ccl5	23	Fcgr2b	44.8927	3.27818	0	0	0.901299	0.261556
Mono_Ccl5	24	Il1b	44.8574	4.92258	0	0	0.983117	0.325137
Mono_Ccl5	25	Cxcl1	44.8549	4.37947	0	0	0.816883	0.153142
Mono_Ccl5	26	C1qa	44.5787	5.21178	0	0	0.729221	0.0815972
Mono_Ccl5	27	Cdkn1a	44.519	3.08127	0	0	0.955844	0.438906
Mono_Ccl5	28	Mcl1	44.4307	2.52655	0	0	0.965584	0.598866
Mono_Ccl5	29	C1qb	44.2286	5.31939	0	0	0.718182	0.0735974
Mono_Ccl5	30	Csf1r	43.6445	3.35237	0	0	0.800649	0.179855
NK_cells	1	Gzma	43.7647	8.06699	0	0	0.878924	0.0918399
NK_cells	2	Irf8	35.3885	2.60652	2.56337e-274	2.32997e-270	0.910314	0.593524
NK_cells	10	Tyrobp	30.4479	3.19463	1.27828e-203	2.32378e-200	0.951794	0.384537
NK_cells	13	Serpinb9	29.7675	2.6841	1.02982e-194	1.44009e-191	0.790359	0.422021
NK_cells	14	Il2rb	29.6174	2.22117	8.91353e-193	1.15742e-189	0.874439	0.526072
NK_cells	15	Tmsb10	29.0478	0.861351	1.64016e-185	1.86353e-182	0.987668	0.990952
NK_cells	17	Ctla2a	28.3606	2.51199	6.20029e-177	6.26195e-174	0.810538	0.43345
NK_cells	19	Ugcg	26.7338	2.87779	1.90682e-157	1.57564e-154	0.678251	0.315623
NK_cells	21	AW112010	26.4327	1.48308	5.76354e-154	4.19102e-151	0.96861	0.878941
NK_cells	22	Gm42418	25.422	1.6908	1.43881e-142	9.68744e-140	1	0.995374
NK_cells	23	Ifngr1	25.2131	1.74885	2.88017e-140	1.80547e-137	0.860987	0.646383
NK_cells	25	AY036118	24.2594	2.35448	5.264e-130	2.99044e-127	0.909193	0.577809
NK_cells	26	Ccl5	23.4402	2.56705	1.6653e-121	8.18203e-119	0.840807	0.620191
NK_cells	28	Malat1	22.3422	1.07922	1.43652e-110	5.80323e-108	0.98991	0.978945
NK_cells	29	Gm10260	21.3574	0.7853	3.32917e-101	1.18669e-98	0.923767	0.915405
TAM_Arg1	1	Fcer1g	55.8371	3.94557	0	0	0.995536	0.453314
TAM_Arg1	2	Lyz2	52.4009	4.75659	0	0	0.977121	0.322257
TAM_Arg1	3	Ftl1	51.7393	2.29454	0	0	0.994978	0.938489
TAM_Arg1	4	Ifitm3	49.8072	3.2634	0	0	0.983817	0.634794
TAM_Arg1	5	Ctss	49.6727	3.14122	0	0	0.961496	0.539247
TAM_Arg1	6	Tyrobp	49.2552	3.6635	0	0	0.985491	0.364504
TAM_Arg1	7	Atp6v0c	47.871	2.25548	0	0	0.954799	0.76343
TAM_Arg1	8	Ctsc	47.6349	3.00688	0	0	0.929687	0.571143
TAM_Arg1	9	Cst3	47.1851	2.26614	0	0	0.966518	0.772448
TAM_Arg1	10	Lst1	46.3533	3.19137	0	0	0.869978	0.276466
TAM_Arg1	11	Npc2	45.046	1.93221	0	0	0.960937	0.837679
TAM_Arg1	12	Cd74	44.9978	4.72511	0	0	0.993862	0.378785
TAM_Arg1	13	Cyba	44.984	1.45224	0	0	0.970982	0.911365
TAM_Arg1	14	Fcgr3	44.1213	3.02928	0	0	0.814732	0.247307
TAM_Arg1	15	H2-Ab1	43.5695	3.57695	0	0	0.966518	0.466016
TAM_Arg1	16	Aif1	42.9613	2.95194	0	0	0.823661	0.26608
TAM_Arg1	17	H2-Aa	42.9259	3.99886	0	0	0.978237	0.35296
TAM_Arg1	18	Alox5ap	42.9013	2.87165	0	0	0.844866	0.288993
TAM_Arg1	19	Ms4a6c	42.5319	2.98846	0	0	0.816406	0.276676
TAM_Arg1	20	Fcgr2b	42.2017	3.00121	0	0	0.8125	0.261483
TAM_Arg1	21	H2-Eb1	42.1358	3.56574	0	0	0.951451	0.34731
TAM_Arg1	23	Fcgr1	41.3325	3.11273	0	0	0.746652	0.204148
TAM_Arg1	24	Cstb	41.1408	2.2769	0	0	0.909598	0.661988
TAM_Arg1	25	Cd68	40.8461	2.7079	0	0	0.780692	0.31159
TAM_Arg1	26	Prdx5	40.7358	2.03395	0	0	0.942522	0.761781
TAM_Arg1	27	Psap	40.6704	2.14527	0	0	0.956473	0.764413
TAM_Arg1	28	Ms4a6d	40.4946	2.25739	0	0	0.852679	0.578231
TAM_Arg1	29	Ctsz	40.2508	2.35455	0	0	0.851562	0.442682
TAM_Arg1	30	Ly6e	39.6161	1.89336	0	0	0.925781	0.760342
TAM_Cxcl10	1	Il1b	102.384	6.80488	0	0	0.998043	0.228854
TAM_Cxcl10	2	Cd14	100.529	5.54501	0	0	0.990018	0.200222
TAM_Cxcl10	3	Cxcl2	98.3599	6.58931	0	0	0.978274	0.192796
TAM_Cxcl10	4	Ptgs2	96.7201	5.49224	0	0	0.943042	0.130887
TAM_Cxcl10	5	Cebpb	94.1884	4.1112	0	0	0.991192	0.415535
TAM_Cxcl10	6	Il1rn	93.5658	5.13206	0	0	0.923273	0.142721
TAM_Cxcl10	7	Cdkn1a	93.081	3.95886	0	0	0.980622	0.360615
TAM_Cxcl10	8	Ctsc	92.9151	3.75893	0	0	0.978274	0.514058
TAM_Cxcl10	9	Fcer1g	91.5815	4.33262	0	0	0.99726	0.381542
TAM_Cxcl10	10	Cstb	90.3417	3.19407	0	0	0.976708	0.615757
TAM_Cxcl10	11	Lilrb4a	90.0113	3.7591	0	0	0.950284	0.312882
TAM_Cxcl10	12	Ifitm3	89.4515	3.75809	0	0	0.992758	0.587007
TAM_Cxcl10	13	Prdx5	89.2429	2.90039	0	0	0.983167	0.729728
TAM_Cxcl10	14	Clec4e	88.9588	4.69027	0	0	0.884126	0.121833
TAM_Cxcl10	15	Mcl1	88.8055	3.08201	0	0	0.974555	0.545072
TAM_Cxcl10	16	Plaur	88.6805	4.17543	0	0	0.9266	0.188944
TAM_Cxcl10	17	Atp6v0c	87.9266	2.62039	0	0	0.985124	0.732071
TAM_Cxcl10	18	Basp1	87.9056	4.14799	0	0	0.907223	0.181876
TAM_Cxcl10	19	Fth1	86.1836	2.32446	0	0	1	0.975062
TAM_Cxcl10	20	Ftl1	85.9186	2.37568	0	0	0.998826	0.930268
TAM_Cxcl10	21	Lilr4b	85.3701	3.63852	0	0	0.907614	0.250377
TAM_Cxcl10	22	Ms4a6c	84.3333	3.91143	0	0	0.893717	0.189898
TAM_Cxcl10	23	Ctss	83.6331	3.41921	0	0	0.984146	0.479033
TAM_Cxcl10	24	Lyz2	83.2314	4.92042	0	0	0.968683	0.237709
TAM_Cxcl10	25	Clec4n	82.6419	4.14544	0	0	0.8532	0.138591
TAM_Cxcl10	26	Tyrobp	82.0242	4.1445	0	0	0.994128	0.280955
TAM_Cxcl10	27	Plek	81.8326	2.9594	0	0	0.920728	0.505043
TAM_Cxcl10	28	Ccrl2	81.7155	3.43213	0	0	0.905069	0.407394
TAM_Cxcl10	29	Cd74	81.6613	5.57466	0	0	0.99589	0.297355
TAM_Cxcl10	30	Zfp36	81.5071	2.79078	0	0	0.970053	0.632873
TAM_Nr4a1	1	Gm42418	40.6142	2.71892	0	0	1	0.99534
TAM_Nr4a1	2	Il1b	34.9646	4.45384	7.77388e-268	3.53303e-264	0.952941	0.336086
TAM_Nr4a1	3	Lyz2	34.5375	3.96574	2.19455e-261	7.76906e-258	0.924887	0.339649
TAM_Nr4a1	4	Lars2	34.533	2.80854	2.56419e-261	7.76906e-258	0.916742	0.713287
TAM_Nr4a1	5	Cd74	33.45	4.44194	2.57728e-245	3.34659e-242	0.98371	0.393648
TAM_Nr4a1	6	AY036118	32.9738	3.07358	1.926e-238	2.33418e-235	0.907692	0.575447
TAM_Nr4a1	7	Cxcl2	32.8443	4.01364	1.37442e-236	1.46974e-233	0.912217	0.303056
TAM_Nr4a1	8	H2-Aa	32.7569	3.85195	2.42547e-235	2.44959e-232	0.951131	0.368704
TAM_Nr4a1	9	H2-Ab1	32.4713	3.41248	2.71365e-231	2.46657e-228	0.935747	0.478963
TAM_Nr4a1	10	Cebpb	32.4664	2.77903	3.17989e-231	2.75273e-228	0.891403	0.498287
TAM_Nr4a1	11	H2-Eb1	31.1756	3.39349	2.27988e-213	1.219e-210	0.914027	0.362948
TAM_Nr4a1	12	Psap	31.0562	2.11899	9.40269e-212	4.7481e-209	0.903167	0.770952
TAM_Nr4a1	13	Ftl1	29.8161	1.5754	2.41993e-195	9.35998e-193	0.960181	0.941136
TAM_Nr4a1	14	Cd14	29.156	3.01439	7.0117e-187	2.19768e-184	0.846154	0.31402
TAM_Nr4a1	15	Cdkn1a	28.7667	2.42596	5.60198e-182	1.69731e-179	0.838009	0.451072
TAM_Nr4a1	16	Fth1	28.4984	1.42368	1.22481e-178	3.47903e-176	0.98914	0.978894
TAM_Nr4a1	17	Tyrobp	28.364	2.80932	5.62506e-177	1.50379e-174	0.895023	0.382546
TAM_Nr4a1	19	Mcl1	27.2519	1.97061	1.57832e-163	3.29795e-161	0.824434	0.609676
TAM_Nr4a1	20	Fcer1g	26.5219	2.58813	5.42342e-155	1.00604e-152	0.901357	0.469643
TAM_Nr4a1	21	Sem1	25.587	1.09813	2.1298e-144	3.36676e-142	0.834389	0.84657
TAM_Nr4a1	23	Gpx1	25.4467	1.63302	7.68192e-143	1.17353e-140	0.815385	0.739772
TAM_Nr4a1	24	Ifitm3	25.3522	2.1744	8.4929e-142	1.26551e-139	0.904072	0.646029
TAM_Nr4a1	25	Tnfaip2	25.0796	2.69409	8.30288e-139	1.19792e-136	0.626244	0.218632
TAM_Nr4a1	26	Atox1	24.3494	1.45554	5.88997e-131	7.75897e-129	0.81448	0.751799
TAM_Nr4a1	27	Cybb	24.2037	2.24185	2.03252e-129	2.60205e-127	0.680543	0.281608
TAM_Nr4a1	28	Clec4e	24.0964	2.41726	2.72856e-128	3.42086e-126	0.643439	0.235524
TAM_Nr4a1	29	Ccl6	23.7714	2.57702	6.60569e-125	8.00565e-123	0.644344	0.254094
TAM_Nr4a1	30	Ctss	23.4875	1.97259	5.46896e-122	6.29242e-120	0.835294	0.553964
Unknown	5	Gm10260	18.4068	1.6226	1.15849e-75	1.40401e-72	0.959459	0.915328
Unknown	6	Mt1	18.2612	4.00021	1.68613e-74	1.91576e-71	0.851351	0.388274
Unknown	11	Mt2	17.6037	5.75085	2.30651e-69	1.74709e-66	0.716216	0.0756261
Unknown	12	Lgals1	17.4535	1.52413	3.23575e-68	2.10081e-65	0.977477	0.946523
Unknown	17	S100a6	16.183	1.66965	6.64703e-59	2.62688e-56	0.954955	0.925538
Unknown	19	Cd63	15.5417	3.63744	1.81116e-54	5.98637e-52	0.716216	0.165785
Unknown	23	Baiap2l1	15.1896	8.11258	4.14482e-52	1.17732e-49	0.594595	0.00691742
Unknown	25	Tm4sf1	15.1018	8.75393	1.57655e-51	4.27763e-49	0.59009	0.00475573
Unknown	27	Cald1	14.8689	8.5674	5.24844e-50	1.38277e-47	0.581081	0.00402408
Unknown	28	Vim	14.7979	1.39647	1.51061e-49	3.91323e-47	0.972973	0.945658
cDC1	1	Cst3	35.4584	6.33551	2.15435e-275	3.91638e-271	1	0.78081
cDC1	2	Naaa	32.6886	5.23571	2.26886e-234	2.06228e-230	0.951276	0.145044
cDC1	3	H2-Eb1	32.5853	5.18936	6.62159e-233	4.01246e-229	1	0.374146
cDC1	4	Naga	32.2338	4.93562	5.93933e-228	2.69927e-224	0.939675	0.176289
cDC1	5	Plbd1	31.8602	4.31752	9.49481e-223	3.45212e-219	0.972158	0.26209
cDC1	6	H2-Aa	31.827	5.36616	2.74155e-222	8.30643e-219	0.99768	0.381179
cDC1	7	Cd24a	31.7836	7.3846	1.09247e-221	2.83714e-218	0.900232	0.0233758
cDC1	8	H2-Ab1	31.5158	4.81407	5.28064e-218	1.19996e-214	0.99536	0.488413
cDC1	9	Atox1	31.4678	3.16419	2.39804e-217	4.84378e-214	0.983759	0.75077
cDC1	10	2026-09-03	30.2091	8.98141	1.80026e-200	3.27268e-197	0.849188	0.00562626
cDC1	11	Wdfy4	30.1717	6.51959	5.56323e-200	9.194e-197	0.860789	0.032217
cDC1	12	Cd74	29.961	5.32938	3.16681e-197	4.79745e-194	1	0.406731
cDC1	13	Tmsb4x	28.7665	1.23013	5.62881e-182	7.30901e-179	0.99768	0.99712
cDC1	14	Ckb	28.6098	5.26715	5.07503e-180	6.15059e-177	0.839907	0.0999665
cDC1	15	Atpif1	28.0092	2.70102	1.25388e-172	1.34084e-169	0.939675	0.558272
cDC1	16	Psap	27.8092	2.96794	3.35969e-170	3.3931e-167	0.990719	0.772672
cDC1	18	H2afz	27.0313	2.27624	6.34216e-161	5.24064e-158	0.981439	0.839585
cDC1	19	Crip1	27.0024	2.57946	1.38432e-160	1.09416e-157	0.99536	0.869491
cDC1	20	S100a11	26.9457	2.00233	6.40162e-160	4.655e-157	0.988399	0.910047
cDC1	22	Gm2a	26.305	2.82523	1.68034e-152	1.09096e-149	0.918794	0.500804
cDC1	23	H2-DMb2	26.1543	3.36111	8.81388e-151	5.52509e-148	0.909513	0.238178
cDC1	24	Ppt1	25.913	3.21627	4.75821e-148	2.79031e-145	0.860789	0.321668
cDC1	26	Alox5ap	25.7302	3.23624	5.3673e-146	2.95673e-143	0.944316	0.312894
cDC1	27	Kctd12	25.0903	3.41899	6.35453e-139	3.20886e-136	0.842227	0.21795
cDC1	28	Clec9a	25.0526	7.5848	1.63661e-138	8.04107e-136	0.707657	0.00723376
cDC1	29	Syngr2	24.8319	2.44785	4.05713e-136	1.94091e-133	0.916473	0.579571
cDC1	30	Serf2	24.8006	1.14934	8.83217e-136	4.11693e-133	0.993039	0.934159
cDC2	1	H2-Eb1	35.2488	4.9734	3.57832e-272	6.50503e-268	1	0.371409
cDC2	2	H2-Aa	35.0853	5.23897	1.12915e-269	1.02634e-265	1	0.378439
cDC2	3	H2-Ab1	34.7476	4.71623	1.50884e-264	9.14308e-261	1	0.486108
cDC2	4	Cst3	34.4491	3.95995	4.63782e-260	2.10777e-256	0.991087	0.78002
cDC2	5	Cd74	33.5465	5.32344	1.0121e-246	3.67978e-243	1	0.404137
cDC2	6	H2-DMb2	31.5856	3.69523	5.82543e-219	1.76501e-215	0.914439	0.23515
cDC2	7	Ifi30	30.7659	3.49179	7.49492e-208	1.94643e-204	0.942959	0.321931
cDC2	8	Atox1	30.602	2.48468	1.14979e-205	2.61276e-202	0.980392	0.749815
cDC2	9	Ifitm3	29.7632	3.35779	1.17167e-194	2.36664e-191	0.998217	0.648974
cDC2	10	Ifitm2	28.2795	2.68779	6.18519e-176	1.1244e-172	0.991087	0.682677
cDC2	11	H2-DMa	27.0731	2.76261	2.04088e-161	3.37284e-158	0.935829	0.382745
cDC2	12	Syngr2	27.0212	2.398	8.32729e-161	1.26151e-157	0.887701	0.578641
cDC2	13	S100a11	26.9498	1.64591	5.73373e-160	8.01796e-157	0.99287	0.90962
cDC2	14	Ifitm1	26.8282	3.8187	1.51363e-158	1.96544e-155	0.88057	0.419307
cDC2	15	Cfp	26.0279	2.97411	2.39099e-149	2.89772e-146	0.853832	0.252977
cDC2	16	Crip1	25.6699	1.94671	2.53307e-145	2.87804e-142	0.98574	0.869122
cDC2	17	Gpx1	24.733	2.02539	4.72207e-135	5.04956e-132	0.976827	0.73811
cDC2	18	Il1r2	24.3675	3.67398	3.78111e-131	3.81871e-128	0.713012	0.200505
cDC2	19	Plbd1	24.31	2.72379	1.53516e-130	1.46883e-127	0.85205	0.261251
cDC2	21	Spi1	23.4971	2.59248	4.36418e-122	3.30568e-119	0.807487	0.242314
cDC2	22	H2-DMb1	23.1778	2.80574	7.62222e-119	4.77808e-116	0.745098	0.180861
cDC2	23	Calm1	23.0425	1.17131	1.74911e-117	1.0599e-114	0.987522	0.935385
cDC2	24	Tyrobp	22.9922	3.17446	5.5752e-117	3.26941e-114	0.99287	0.390077
cDC2	25	Alox5ap	22.9792	2.55101	7.52406e-117	4.27437e-114	0.887701	0.311201
cDC2	26	Csf2rb	22.7439	2.67188	1.65048e-114	9.09214e-112	0.762923	0.211941
cDC2	27	Il1b	22.6627	3.89788	1.04628e-113	5.59421e-111	0.964349	0.347158
cDC2	28	Basp1	22.0476	2.46297	1.00756e-107	4.95041e-105	0.877005	0.293407
cDC2	30	Ctss	21.9825	2.38142	4.23788e-107	1.92601e-104	0.97861	0.556408
CCR7+DC	1	Cst3	9.29444	4.64815	1.47991e-20	2.69032e-16	0.95122	0.783702
CCR7+DC	2	Crip1	8.76761	2.83957	1.82492e-18	9.93166e-15	0.95122	0.871174
CCR7+DC	3	Ccr7	8.7641	5.46767	1.88271e-18	9.93166e-15	0.853659	0.214645
CCR7+DC	4	Pkib	8.65766	5.86773	4.8156e-18	1.75086e-14	0.804878	0.0629752
CCR7+DC	5	Calm1	8.44535	2.03026	3.03144e-17	9.18474e-14	0.95122	0.936331
CCR7+DC	6	Cacnb3	8.34763	9.03791	6.96451e-17	1.42873e-13	0.756098	0.00786777
CCR7+DC	7	Ccl22	8.3458	9.31725	7.07333e-17	1.42873e-13	0.756098	0.00585124
CCR7+DC	8	Tbc1d4	8.17718	6.4813	2.90568e-16	5.28223e-13	0.756098	0.0470083
CCR7+DC	9	Fscn1	8.0783	9.63828	6.56749e-16	1.00018e-12	0.731707	0.00806612
CCR7+DC	10	Ramp3	7.41721	5.23553	1.19614e-13	1.27909e-10	0.707317	0.0881322
CCR7+DC	11	Serpinb9	7.24885	2.89399	4.20336e-13	4.02173e-10	0.829268	0.432331
CCR7+DC	13	Cytip	7.10501	2.04159	1.20311e-12	1.04149e-09	0.853659	0.704793
CCR7+DC	14	Tmem131	7.03571	4.38233	1.98242e-12	1.59199e-09	0.707317	0.161884
CCR7+DC	15	Psme2	6.97313	1.58318	3.09973e-12	2.34791e-09	0.902439	0.861025
CCR7+DC	16	Ccl5	6.65452	3.28632	2.84219e-11	1.66672e-08	0.926829	0.626281
CCR7+DC	17	Marcks	6.64455	3.66262	3.04143e-11	1.72781e-08	0.707317	0.197851
CCR7+DC	18	Net1	6.55123	4.99488	5.70641e-11	3.05108e-08	0.634146	0.0843306
CCR7+DC	19	Tmsb4x	6.23837	0.823412	4.42164e-10	1.86933e-07	0.97561	0.997157
CCR7+DC	20	Gnb4	6.06773	4.85891	1.29728e-09	4.86489e-07	0.585366	0.0614876
CCR7+DC	21	Map4k4	5.97854	3.16813	2.25141e-09	7.87084e-07	0.682927	0.27524
CCR7+DC	22	Lsp1	5.97342	1.70638	2.32326e-09	7.96877e-07	0.804878	0.72519
CCR7+DC	23	Mmp25	5.93982	5.3617	2.85328e-09	8.79148e-07	0.560976	0.0391405
CCR7+DC	24	Iscu	5.89418	2.93645	3.76548e-09	1.10408e-06	0.682927	0.40562
CCR7+DC	25	Basp1	5.88891	2.50054	3.88758e-09	1.12178e-06	0.829268	0.303504
CCR7+DC	26	Tuba1a	5.86381	2.75751	4.52352e-09	1.24596e-06	0.682927	0.343636
CCR7+DC	27	Itga4	5.77587	3.3265	7.65579e-09	1.9602e-06	0.634146	0.193091
CCR7+DC	28	Rogdi	5.66298	5.52212	1.48768e-08	3.29811e-06	0.536585	0.0506116
CCR7+DC	29	Sp140	5.58277	2.57589	2.36719e-08	5.07183e-06	0.682927	0.400066
CCR7+DC	30	Tmem123	5.53227	2.38662	3.16109e-08	6.68203e-06	0.707317	0.497388
pDC	1	Klk1	41.3226	12.9519	0	0	0.97545	0.00320081
pDC	2	Bst2	41.2602	4.84564	0	0	0.998363	0.592251
pDC	3	Siglech	41.1906	12.595	0	0	0.972177	0.00171833
pDC	4	Cox6a2	40.971	11.9885	0	0	0.967267	0.00333558
pDC	5	Grn	39.4227	4.36167	0	0	0.986907	0.413848
pDC	6	Rnase6	39.2794	6.44185	0	0	0.942717	0.0710916
pDC	7	Pltp	39.2284	5.67921	0	0	0.959083	0.133086
pDC	8	Ccr9	39.0911	11.0534	0	0	0.923077	0.00289757
pDC	9	Iglc3	39.0729	11.1658	0	0	0.923077	0.0018531
pDC	10	Cyb561a3	38.3894	6.06916	0	0	0.923077	0.0962601
pDC	11	Pld4	38.2957	4.7891	0	0	0.952537	0.18814
pDC	12	Tyrobp	37.4775	4.29944	2.14379e-307	3.24766e-304	0.99509	0.389016
pDC	13	Ctsh	37.4653	4.40791	3.38008e-307	4.72666e-304	0.957447	0.227291
pDC	15	Irf8	37.0433	3.35483	2.30104e-300	2.7887e-297	0.986907	0.594946
pDC	16	Klk1b27	36.8738	11.284	1.21791e-297	1.38377e-294	0.870704	0.0013814
pDC	17	Dnajc7	36.8072	3.95505	1.41506e-296	1.5132e-293	0.934534	0.341509
pDC	18	Psap	36.6241	3.41109	1.18119e-293	1.19294e-290	1	0.771159
pDC	19	Serp1	36.4934	3.37565	1.41273e-291	1.35168e-288	0.954173	0.496226
pDC	20	Tcf4	36.4415	5.72351	9.39144e-291	8.53635e-288	0.88707	0.0705526
pDC	21	Sell	36.2916	5.13218	2.19375e-288	1.89906e-285	0.908347	0.100741
pDC	22	Tspan13	35.5804	3.88645	2.81642e-277	2.32726e-274	0.934534	0.275943
pDC	23	Ctsl	35.5371	4.36531	1.31454e-276	1.039e-273	0.972177	0.271968
pDC	24	Mpeg1	35.3413	3.94114	1.36596e-273	1.03466e-270	0.95581	0.246867
pDC	25	Atp1b1	35.3258	7.5106	2.36315e-273	1.71839e-270	0.842881	0.017217
pDC	26	St8sia4	35.2996	4.21264	5.9497e-273	4.15998e-270	0.90671	0.200943
pDC	27	Plac8	35.1463	3.08611	1.32445e-270	8.9175e-268	0.986907	0.636321
pDC	28	Ighm	34.7108	5.26804	5.41345e-264	3.51468e-261	0.85761	0.0695081
pDC	29	Lair1	34.4414	4.30743	6.05897e-260	3.79814e-257	0.88216	0.160613
pDC	30	Napsa	34.3515	3.7002	1.33941e-258	8.11639e-256	0.918167	0.257143

## Sheet: Sup2_Antibody list
	Species	Staining	Antigen	Clone	Manufacturer	Conjugate
Mouse Mass cytometry antibody list	Mouse	Cell-surface staining	CD11b	M1/70	Fluidigm	148Nd
	Mouse	Cell-surface staining	CD49b	HMa2	Fluidigm	164Dy
	Mouse	Cell-surface staining	TCRβ	H57-597	Fluidigm	143Nd
	Mouse	Cell-surface staining	CD8a	53-6.7	Fluidigm	146Nd
	Mouse	Cell-surface staining	CD62L	MEL-14	Fluidigm	160Gd
	Mouse	Cell-surface staining	CD44	IM7	Fluidigm	171Yb
	Mouse	Cell-surface staining	Ly-6C	HK1.4	Fluidigm	150Nd
	Mouse	Cell-surface staining	CD25	3C7	Fluidigm	151Eu
	Mouse	Cell-surface staining	ICOS	7E.17G9	Fluidigm	176Yb
	Mouse	Cell-surface staining	CD69	H1.2F3	Fluidigm	145Nd
	Mouse	Cell-surface staining	CD40L	MR1	Fluidigm	170Er
	Mouse	Cell-surface staining	PD-1	RMP1-30	Fluidigm	159Tb
	Mouse	Cell-surface staining	Tim-3	RMT3-23	Fluidigm	162Dy
	Mouse	Cell-surface staining	LAG-3	C9B7W	Fluidigm	174Yb
	Mouse	Cell-surface staining	TIGIT	1G9	BioLegend	166Er
	Mouse	Cell-surface staining	KLRG1	2F1	Thermo Fisher Scientific	142Nd
	Mouse	Cell-surface staining	CCR8	SA214G2	BioLegend	155Gd
	Mouse	Intracellular staining	CD4	RM4-5	Fluidigm	172Yb
	Mouse	Intracellular staining	Foxp3	FJK-16s	Fluidigm	158Gd
	Mouse	Intracellular staining	CTLA-4	UC10-4B9	Fluidigm	154Sm
	Mouse	Intracellular staining	TOX	TXRX10	Thermo Fisher Scientific	156Gd
	Mouse	Intracellular staining	TCF1	C63D9	Cell Signaling	175Lu
	Mouse	Intracellular staining	Tbet	4B10	Fluidigm	161Dy
	Mouse	Intracellular staining	EOMES	Dan11mag	Thermo Fisher Scientific	152Sm
	Mouse	Intracellular staining	Ki-67	B56	Fluidigm	168Er
	Mouse	Intracellular staining	GzmB	GB11	Fluidigm	173Yb
	Mouse	Intracellular staining	IFNγ	XMG1.2	Fluidigm	165Ho
	Mouse	Intracellular staining	TNFα	MP6-XT22	Fluidigm	141Pr
	Mouse	Intracellular staining	IL-2	JES6-5H4	Fluidigm	144Nd
	Mouse	Intracellular staining	IL-17A	TC11-18H10.1	Fluidigm	169Tm
Mouse Flow cytometry antibody list	Mouse	Cell-surface staining	CD45	30-F11	BioLegend	-
	Mouse	Cell-surface staining	CD3e	145-2C11	BioLegend	-
	Mouse	Cell-surface staining	CD8a	53-6.7	BioLegend	-
	Mouse	Cell-surface staining	gp70 tetramer	-	MBL	-
	Mouse	Cell-surface staining	PD-1	29F.1A12	BioLegend	-
	Mouse	Cell-surface staining	SiglecF	E50-2440	BD	-
	Mouse	Cell-surface staining	Ly-6G	1A8	BioLegend	-
	Mouse	Cell-surface staining	CD103	M290	BD	-
	Mouse	Cell-surface staining	I-A/I-E	M5/114.15.2	BioLegend	-
	Mouse	Cell-surface staining	CD80	16-10A1	eBioscience	-
	Mouse	Cell-surface staining	CD11b	M1/70	eBioscience	-
	Mouse	Cell-surface staining	CD86	GL-1	BioLegend	-
	Mouse	Cell-surface staining	Ly-6c	HK1.4	BioLegend	-
	Mouse	Cell-surface staining	CD11c	N418	eBioscience	-
	Mouse	Intracellular staining	CD4	RM4-5	BioLegend	-
	Mouse	Intracellular staining	Foxp3	FJK-16s	Thermo Fisher Scientific	-
	Mouse	Intracellular staining	TOX	TXRX10	Thermo Fisher Scientific	-
Human Immunohistochemistry antibody list	Human	Cell-surface staining	FOXP3	236A/E7	Abcam	-
	Human	Cell-surface staining	CCR8	Original	in house	-
	Human	Cell-surface staining	CD8A	4B11	Leica	-
	Human	Cell-surface staining	LAMP3	E6E5U	CST	-

## Sheet: Sup3_Patients data
Patient characteristics of colorectal cancer liver metastasis
		n=79
Age	years, median (IQR)	70 (63-74)
Sex
Male		42 (53.2%)
Female		37 (46.8%)
Onset of liver metastasis
Synchronous		34 (43.0%)
Metachronous		45 (57.0%)
Site of primary tumor
Right-sided colon		17 (21.5%)
Left-sided colon		62 (78.5%)
Preoperative chemotherapy		45 (57.0%)
Carcinoembryonic antigen	ng/mL, median (IQR)	5 (3-18)
Carbohydrate antigen 19-9	U/mL, median (IQR)	15.8 (8.5-38.7)
Number of tumors
Single		40 (50.6%)
Multiple		39 (49.4%)
Maximum tumor diameter	mm, median (IQR)	23 (13-40)
RAS status of primary tumor
Wild-type		35 (44.3%)
Mutant		38 (48.1%)
n/a		6 (7.6%)
BRAF status of primary tumor
Wild-type		73 (92.4%)
n/a		6 (7.6%)
Microsatellite instability of primary tumor
Stable		49 (62.0%)
n/a		30 (38.0%)
